# Supplementary material for: Outcomes among North American patients with diffuse large B-cell lymphoma are independent of tumor Epstein-Barr virus positivity or immunosuppression
Source: PubMed Central journal article supplement — Haematologica. 2017 Nov 23;103(2):297–303. doi: 10.3324/haematol.2017.176511 (PMC5792274; doi:10.3324/haematol.2017.176511), 2018-02
Supplement: 2017.176511.TRACY_SUPPL.pdf [file 2017.176511.TRACY_SUPPL.pdf]

## Outcomes among North American patients with diffuse large B-cell lymphoma are independent of tumor Epstein-Barr virus positivity or immunosuppression

Sean I. Tracy,<sup>1</sup> Thomas M. Habermann,<sup>1</sup> Andrew L. Feldman,<sup>1</sup> Matthew J. Maurer,<sup>1</sup> Ahmet Dogan,<sup>2</sup> Usha S. Perepu,<sup>3</sup> Sergei Syrbu,<sup>3</sup> Stephen M. Ansell,<sup>1</sup> Carrie A. Thompson,<sup>1</sup> George J. Weiner,<sup>3</sup> Grzegorz S. Nowakowski,<sup>1</sup> Cristine Allmer,<sup>1</sup> Susan L. Slager,<sup>1</sup> Thomas E. Witzig,<sup>1</sup> James R. Cerhan<sup>1</sup> and Brian K. Link<sup>3</sup>

<sup>1</sup>Mayo Clinic, Rochester, MN; <sup>2</sup>Memorial Sloan Kettering Cancer Center, New York, NY and <sup>3</sup>University of Iowa, Iowa City, IA, USA

©2017 Ferrata Storti Foundation. This is an open-access paper. doi:10.3324/haematol.2017.176511

Received: July 14, 2017.

Accepted: November 22, 2017.

Pre-published: November 23, 2017.

Correspondence: brian-link@uiowa.edu

---

**Supplemental Table 1:** Demographic and clinical characteristics of patients included in the study compared to all patients in the MER.

|                                   | <b>MER patients included in study cohort (N=362)</b> | <b>MER patients not included in study cohort (N=719)</b> | <b>Total (N=1,081)</b> | <b>p value</b> |
|-----------------------------------|------------------------------------------------------|----------------------------------------------------------|------------------------|----------------|
| <b>Diagnosis Age</b>              |                                                      |                                                          |                        | 0.26           |
| Median                            | 63                                                   | 64                                                       | 64                     |                |
| Q1, Q3                            | 53, 72                                               | 54, 73                                                   | 54, 72                 |                |
| Range                             | (20-89)                                              | (18-95)                                                  | (18-95)                |                |
|                                   |                                                      |                                                          |                        |                |
| <b>Age 51+</b>                    |                                                      |                                                          |                        | 0.83           |
| No                                | 68 (18.8%)                                           | 139 (19.3%)                                              | 207 (19.1%)            |                |
| Yes                               | 294 (81.2%)                                          | 580 (80.7%)                                              | 874 (80.9%)            |                |
|                                   |                                                      |                                                          |                        |                |
| <b>Age Group</b>                  |                                                      |                                                          |                        | 0.46           |
| <=60                              | 152 (42.0%)                                          | 285 (39.6%)                                              | 437 (40.4%)            |                |
| >60                               | 210 (58.0%)                                          | 434 (60.4%)                                              | 644 (59.6%)            |                |
|                                   |                                                      |                                                          |                        |                |
| <b>Gender</b>                     |                                                      |                                                          |                        | 0.43           |
| F                                 | 147 (40.6%)                                          | 310 (43.1%)                                              | 457 (42.3%)            |                |
| M                                 | 215 (59.4%)                                          | 409 (56.9%)                                              | 624 (57.7%)            |                |
|                                   |                                                      |                                                          |                        |                |
| <b>PS</b>                         |                                                      |                                                          |                        | 0.67           |
| Missing                           | 1 (0.3%)                                             | 5 (0.7%)                                                 | 6 (0.6%)               |                |
| <2                                | 291 (80.4%)                                          | 573 (79.7%)                                              | 864 (79.9%)            |                |
| >=2                               | 70 (19.3%)                                           | 141 (19.6%)                                              | 211 (19.5%)            |                |
|                                   |                                                      |                                                          |                        |                |
| <b>Ann Arbor Stage</b>            |                                                      |                                                          |                        | <b>0.04</b>    |
| Missing                           | 3 (0.8%)                                             | 12 (1.7%)                                                | 15 (1.4%)              |                |
| I-II                              | 144 (39.8%)                                          | 234 (32.5%)                                              | 378 (35.0%)            |                |
| III-IV                            | 215 (59.4%)                                          | 473 (65.8%)                                              | 688 (63.6%)            |                |
|                                   |                                                      |                                                          |                        |                |
| <b>Number of Extranodal Sites</b> |                                                      |                                                          |                        | 0.05           |
| <=1                               | 297 (82.0%)                                          | 553 (76.9%)                                              | 850 (78.6%)            |                |
| >1                                | 65 (18.0%)                                           | 166 (23.1%)                                              | 231 (21.4%)            |                |
|                                   |                                                      |                                                          |                        |                |
| <b>LDH</b>                        |                                                      |                                                          |                        | <b>0.007</b>   |
| Missing                           | 40 (11.0%)                                           | 69 (9.6%)                                                | 109 (10.1%)            |                |
| <=Normal                          | 163 (45.0%)                                          | 262 (36.4%)                                              | 425 (39.3%)            |                |
| >Normal                           | 159 (43.9%)                                          | 388 (54.0%)                                              | 547 (50.6%)            |                |
|                                   |                                                      |                                                          |                        |                |
| <b>IPI Group</b>                  |                                                      |                                                          |                        | <b>0.01</b>    |

|                          | <b>MER patients included in study cohort (N=362)</b> | <b>MER patients not included in study cohort (N=719)</b> | <b>Total (N=1,081)</b> | <b>p value</b>   |
|--------------------------|------------------------------------------------------|----------------------------------------------------------|------------------------|------------------|
| 0-1 Low                  | 130 (35.9%)                                          | 204 (28.4%)                                              | 334 (30.9%)            |                  |
| 2 Low Intermediate       | 109 (30.1%)                                          | 215 (29.9%)                                              | 324 (30.0%)            |                  |
| 3 High Intermediate      | 86 (23.8%)                                           | 185 (25.7%)                                              | 271 (25.1%)            |                  |
| 4-5 High                 | 37 (10.2%)                                           | 115 (16.0%)                                              | 152 (14.1%)            |                  |
|                          |                                                      |                                                          |                        |                  |
| <b>Age-adjusted IPI</b>  |                                                      |                                                          |                        | <b>0.008</b>     |
| Missing                  | 0 (0.0%)                                             | 4 (0.6%)                                                 | 4 (0.4%)               |                  |
| 0                        | 103 (28.5%)                                          | 141 (19.6%)                                              | 244 (22.6%)            |                  |
| 1                        | 114 (31.5%)                                          | 232 (32.3%)                                              | 346 (32.0%)            |                  |
| 2                        | 105 (29.0%)                                          | 256 (35.6%)                                              | 361 (33.4%)            |                  |
| 3                        | 40 (11.0%)                                           | 86 (12.0%)                                               | 126 (11.7%)            |                  |
|                          |                                                      |                                                          |                        |                  |
| <b>BM Involvement</b>    |                                                      |                                                          |                        | 0.69             |
| Missing                  | 31 (8.6%)                                            | 73 (10.2%)                                               | 104 (9.6%)             |                  |
| Concordant               | 71 (19.6%)                                           | 135 (18.8%)                                              | 206 (19.1%)            |                  |
| Discordant               | 260 (71.8%)                                          | 511 (71.1%)                                              | 771 (71.3%)            |                  |
|                          |                                                      |                                                          |                        |                  |
| <b>Bulky Disease</b>     |                                                      |                                                          |                        | 0.16             |
| Missing                  | 4 (1.1%)                                             | 15 (2.1%)                                                | 19 (1.8%)              |                  |
| Yes                      | 29 (8.0%)                                            | 78 (10.8%)                                               | 107 (9.9%)             |                  |
| No                       | 329 (90.9%)                                          | 626 (87.1%)                                              | 955 (88.3%)            |                  |
|                          |                                                      |                                                          |                        |                  |
| <b>GCB/non-GCB</b>       |                                                      |                                                          |                        | <b>&lt;0.001</b> |
| Missing                  | 75 (20.7%)                                           | 378 (52.6%)                                              | 453 (41.9%)            |                  |
| Non-GCB                  | 128 (35.4%)                                          | 100 (13.9%)                                              | 228 (21.1%)            |                  |
| GCB                      | 159 (43.9%)                                          | 241 (33.5%)                                              | 400 (37.0%)            |                  |
|                          |                                                      |                                                          |                        |                  |
| <b>Composite</b>         |                                                      |                                                          |                        | <b>&lt;0.001</b> |
| No                       | 296 (81.8%)                                          | 632 (87.9%)                                              | 928 (85.8%)            |                  |
| Yes                      | 66 (18.2%)                                           | 87 (12.1%)                                               | 153 (14.2%)            |                  |
|                          |                                                      |                                                          |                        |                  |
| <b>Immuno-chemo</b>      |                                                      |                                                          |                        | 0.75             |
| No                       | 38 (10.5%)                                           | 80 (11.1%)                                               | 118 (10.9%)            |                  |
| Yes                      | 324 (89.5%)                                          | 639 (88.9%)                                              | 963 (89.1%)            |                  |
|                          |                                                      |                                                          |                        |                  |
| <b>Radiation Therapy</b> |                                                      |                                                          |                        | <b>0.001</b>     |
| No                       | 289 (79.8%)                                          | 627 (87.2%)                                              | 916 (84.7%)            |                  |
| Yes                      | 73 (20.2%)                                           | 92 (12.8%)                                               | 165 (15.3%)            |                  |
|                          |                                                      |                                                          |                        |                  |
| <b>FU Status</b>         |                                                      |                                                          |                        | 0.10             |
| Alive                    | 243 (67.1%)                                          | 446 (62.0%)                                              | 689 (63.7%)            |                  |
| Dead                     | 119 (32.9%)                                          | 273 (38.0%)                                              | 392 (36.3%)            |                  |
|                          |                                                      |                                                          |                        |                  |

|                  | <b>MER patients<br/>included in study<br/>cohort<br/>(N=362)</b> | <b>MER patients not<br/>included in study<br/>cohort<br/>(N=719)</b> | <b>Total<br/>(N=1,081)</b> | <b>p value</b>   |
|------------------|------------------------------------------------------------------|----------------------------------------------------------------------|----------------------------|------------------|
| <b>EFS24</b>     |                                                                  |                                                                      |                            | <b>&lt;0.001</b> |
| Missing          | 8 (2.2%)                                                         | 0 (0.0%)                                                             | 8 (0.7%)                   |                  |
| Achieved         | 250 (69.1%)                                                      | 460 (64.0%)                                                          | 710 (65.7%)                |                  |
| Failed           | 104 (28.7%)                                                      | 259 (36.0%)                                                          | 363 (33.6%)                |                  |
|                  |                                                                  |                                                                      |                            |                  |
| <b>FU Months</b> |                                                                  |                                                                      |                            | <b>&lt;0.001</b> |
| Median           | 59.1                                                             | 47.2                                                                 | 48.5                       |                  |
| Q1, Q3           | 32.6, 94.9                                                       | 21.7, 82.9                                                           | 24.9, 83.5                 |                  |
| Range            | (0.7-155.2)                                                      | (0.4-155.2)                                                          | (0.4-155.2)                |                  |

**Supplemental Table 2:** Clinical characteristics of immunosuppressed patients.

| <b><u>Patient</u></b> | <b><u>Age</u></b> | <b><u>EBV</u></b> | <b><u>Condition</u></b>        | <b><u>Immunosuppression</u></b>        |
|-----------------------|-------------------|-------------------|--------------------------------|----------------------------------------|
| 1                     | 42                | -                 | CVID                           | none                                   |
| 2                     | 42                | -                 | Histiocytosis X                | cyclophosphamide, MTX, CS              |
| 3                     | 46                | -                 | SLE                            | mycophenolate, azathioprine, HCQ, CS   |
| 4                     | 49                | -                 | RA                             | MTX                                    |
| 5                     | 51                | -                 | RA                             | MTX                                    |
| 6                     | 52                | -                 | RA                             | MTX, HCQ                               |
| 7                     | 53                | -                 | RA, PMR                        | infliximab, CS                         |
| 8                     | 54                | -                 | scleroderma<br>HCV-related     | CS                                     |
| 9                     | 56                | -                 | vasculitis                     | HCQ, CS                                |
| 10                    | 56                | -                 | RA                             | infliximab, MTX                        |
| 11                    | 56                | +                 | RA, Felty's<br>syndrome        | MTX, CS                                |
| 12                    | 57                | -                 | Crohn's disease                | mesalamine, sulfasalazine, CS          |
| 13                    | 58                | -                 | PMR                            | CS                                     |
| 14                    | 59                | -                 | SLE                            | MTX, CS                                |
| 15                    | 59                | -                 | SLE                            | HCQ                                    |
| 16                    | 59                | -                 | ulcerative colitis             | Sulfasalazine                          |
| 17                    | 61                | -                 | RA                             | etanercept, MTX, CS                    |
| 18                    | 62                | -                 | RA                             | CS                                     |
| 19                    | 64                | -                 | RA                             | Etanercept                             |
| 20                    | 64                | -                 | RA                             | MTX                                    |
| 21                    | 64                | -                 | RA                             | MTX                                    |
| 22                    | 65                | -                 | RA                             | adalimumab, HCQ, MTX, CS               |
| 23                    | 66                | +                 | seizure disorder<br>autoimmune | phenytoin, levetiracetam               |
| 24                    | 67                | -                 | hepatitis                      | Azathioprine                           |
| 25                    | 67                | -                 | MCTD                           | CS                                     |
| 26                    | 69                | -                 | RA                             | MTX, infliximab, gold, d-penicillamine |
| 27                    | 69                | -                 | seizure disorder               | Carbamazepine                          |
| 28                    | 71                | -                 | RA                             | MTX                                    |
| 29                    | 71                | +                 | SLE                            | HCQ, mycophenolic acid, CS             |
| 30                    | 72                | -                 | RA                             | MTX                                    |
| 31                    | 74                | -                 | RA                             | MTX                                    |
| 32                    | 74                | -                 | RA                             | MTX                                    |

|    |    |   |                 |                                     |
|----|----|---|-----------------|-------------------------------------|
| 33 | 75 | - | Crohn's disease | Azathioprine<br>HCQ, sulfasalazine, |
| 34 | 75 | - | RA              | CS                                  |
| 35 | 76 | + | GPA             | azathioprine, cyclophosphamide, CS  |
| 36 | 77 | - | RA              | MTX                                 |
| 37 | 78 | - | RA              | MTX                                 |
| 38 | 78 | - | sarcoidosis     | carbamazepine, MTX, CS              |
| 39 | 79 | - | SLE             | HCQ                                 |

Abbreviations: CVID = common variable immunodeficiency. SLE = systemic lupus erythrematosus. RA = rheumatoid arthritis, PMR = polymyalgia rheumatica. MCTD = mixed connective tissue disease. GPA = granulomatosis with polyangiitis. MTX = methotrexate. CS = corticosteroids. HCQ = hydroxychloroquine.
