# Supplementary material for: Outcomes among North American patients with diffuse large B-cell lymphoma are independent of tumor Epstein-Barr virus positivity or immunosuppression
Source: PubMed Central journal article supplement — Haematologica. 2017 Nov 23;103(2):297–303. doi: 10.3324/haematol.2017.176511 (PMC5792274; doi:10.3324/haematol.2017.176511), 2018-02
Supplement: 2017_176511-Disclosures_and_Contributions.pdf [file 2017_176511-Disclosures_and_Contributions.pdf]

Haematologica  
HAEMATOL/2017/176511  
Version 4

Outcomes among US patients with diffuse large B cell lymphoma are independent of tumor Epstein Barr virus positivity or immunosuppression

Sean I. Tracy, Thomas M. Habermann, Andrew L. Feldman, Matthew J. Maurer, Ahmet Dogan, Usha S. Perepu, Sergei Syrbu, Stephen M. Ansell, Carrie A. Thompson, George J. Weiner, Grzegorz S. Nowakowski, Cristine Allmer, Susan L. Slager, Thomas E. Witzig, James R. Cerhan, and Brian K. Link

Disclosures: This work was supported by grants from the National Institutes of Health (Lymphoma SPORE (P50 CA CA97274), Lymphoma Epidemiology of Outcomes (U01 CA195568) and the Predolin Foundation The authors declare no competing financial interests in this work

Contributions: Tracy, Link, Maurer and Allmer had full access to all of the data in the study and take responsibility for the integrity of the data and the accuracy of the data analysis. Study concept and design: Tracy, Link Acquisition, analysis, or interpretation of data: All Drafting of the manuscript: Tracy, Maurer, Link, Cerhan Critical revision of the manuscript for important intellectual content: All. Statistical analysis: Maurer, Slager, Allmer Obtained funding: Weiner Administrative, technical, or material support: Weiner Study supervision: Link, Cerhan, Habermann, Feldman, Slager
